# Supplementary material
Source: MDPI journal article supplement (https://www.mdpi.com/2077-1312/9/9/1011)
Supplement: s1 [file s1]

## Supplementary materials—Future changes in built environment risk to coastal flooding, permanent inundation, and coastal erosion hazards

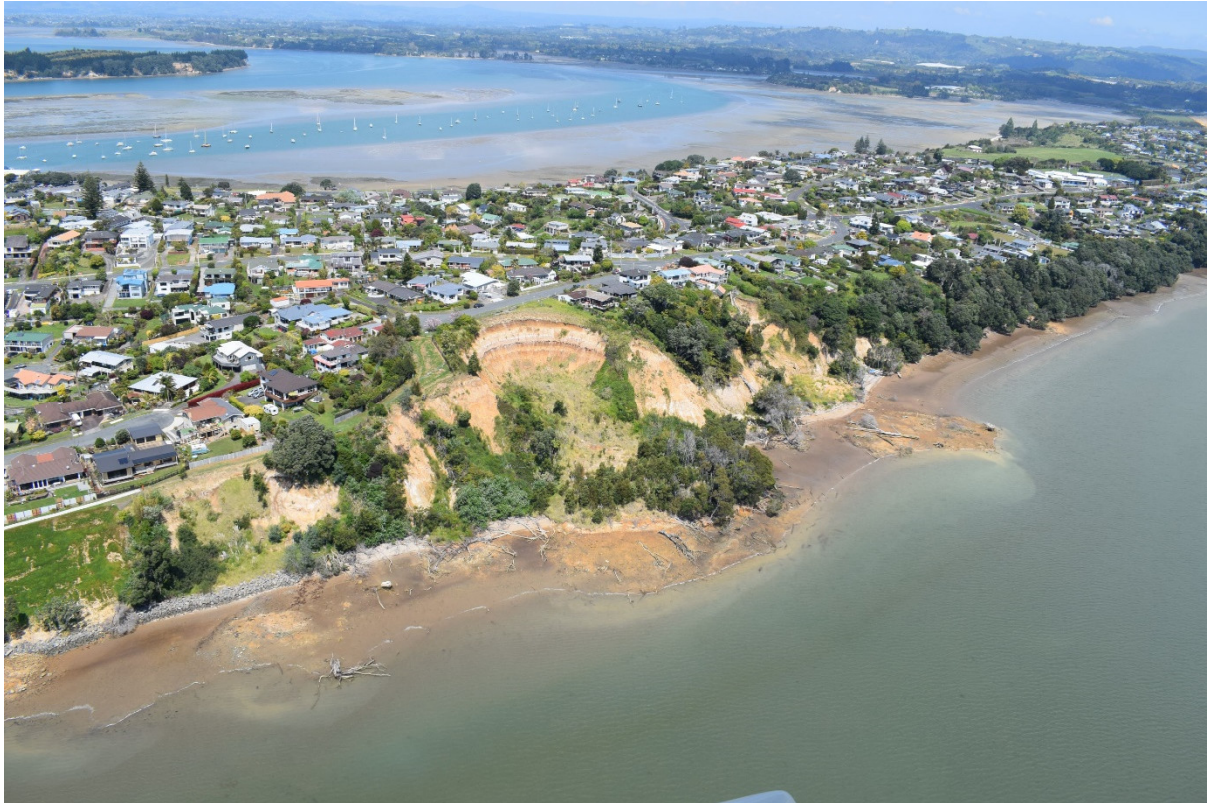

**Figure S1. Photograph of a coastal landslide in Omokoroa within Tauranga Harbour.** The landslide resulted in more than 1ha of land lost. Material at the toe is now becoming vegetated but will continue to be eroded and removed until the erosion of the cliff toe resumes.

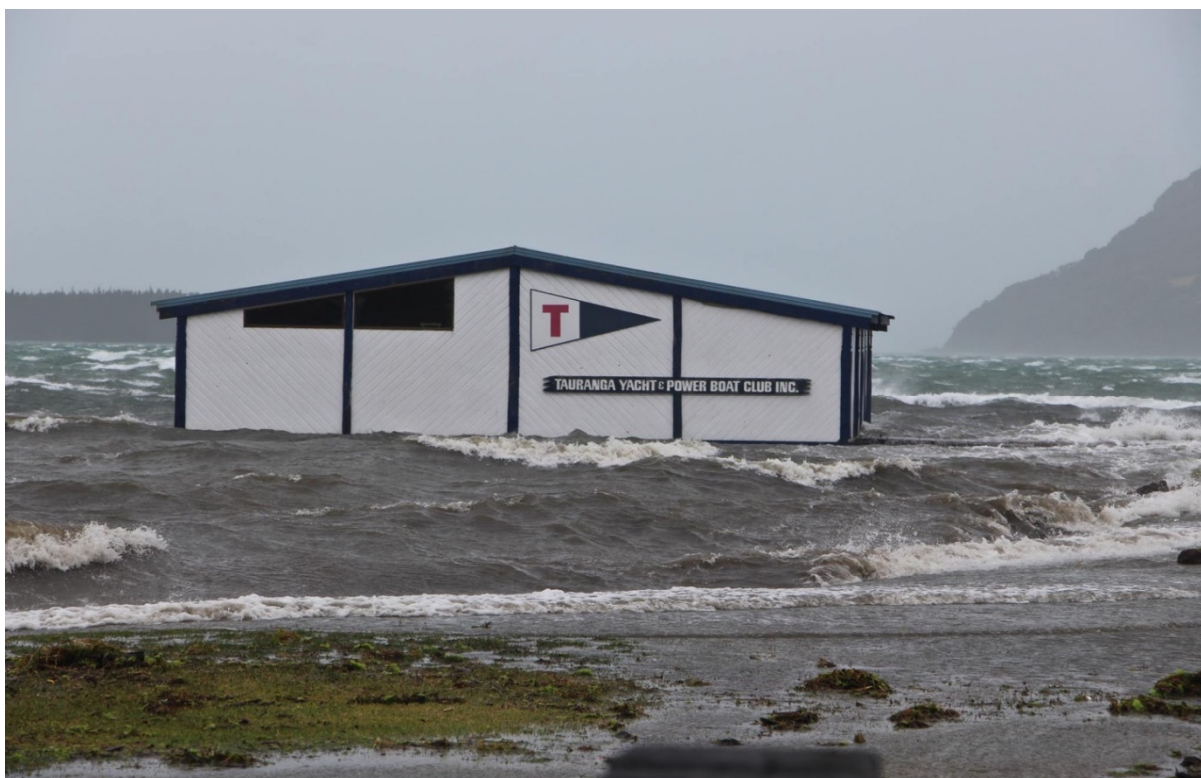

**Figure S2. Flooding of low-lying coastal land during the high storm-tide on 5 February 2018.** The sea-level reached on this date has about a 3% chance of occurring in any year at present-day MSL (Stephens 2017).

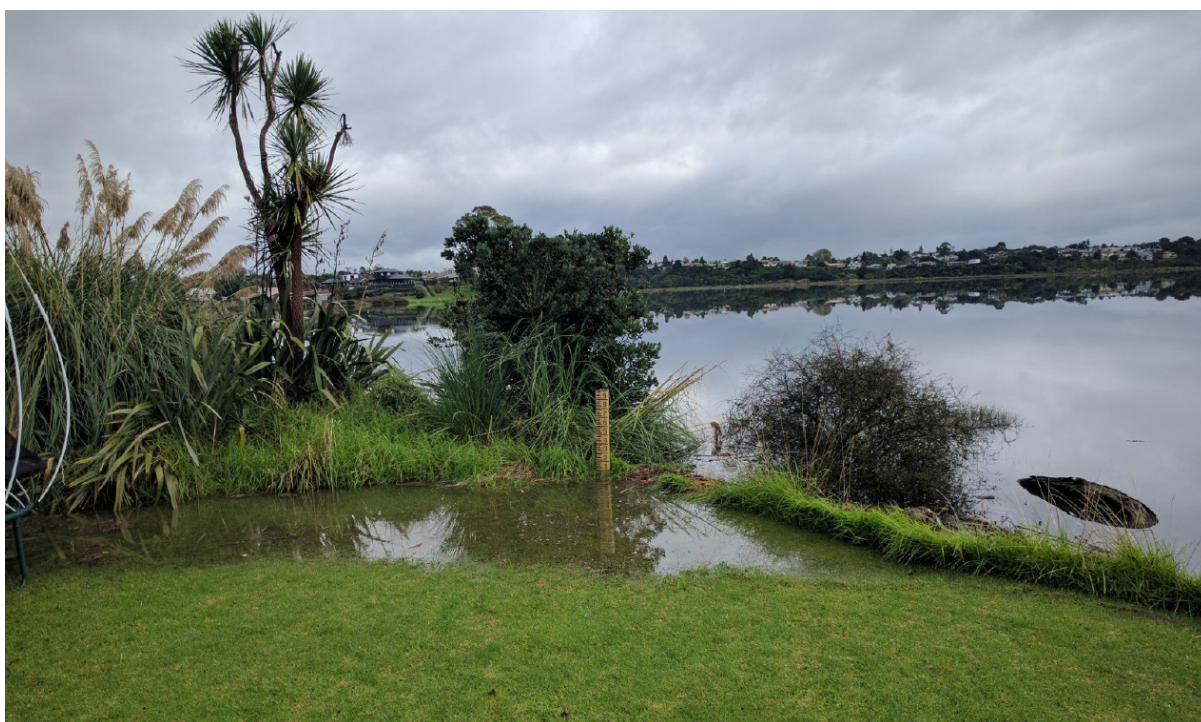

**Figure S3. c, 10:30, 30th April 2017.** Photo credit: Kate Enright.



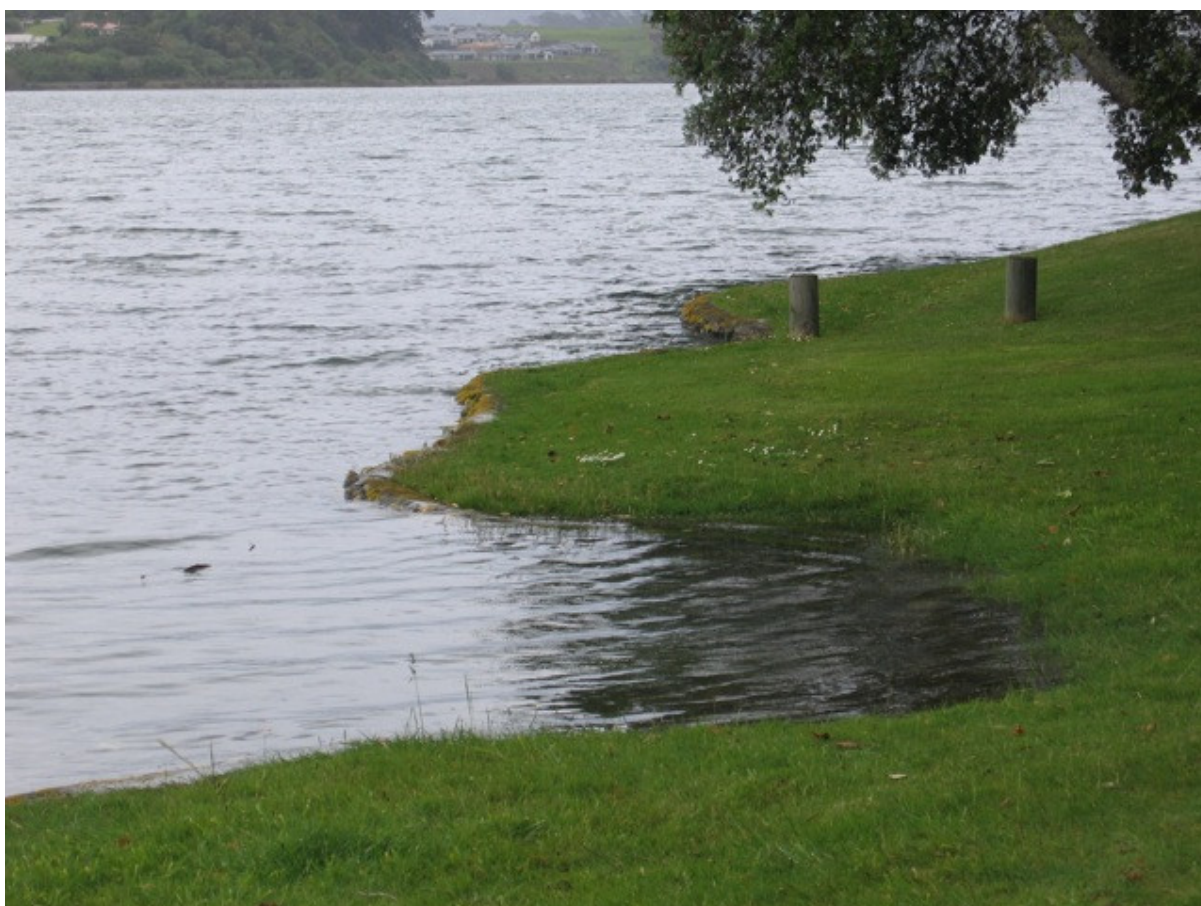

**Figure S4. High tide at the Bay St Reserve which borders the Matua Estuary on 17 November 2016.** Photo credit: Jim McMaster.

**Table S1. Land area flooded to a depth  $\geq 0.3$  m (km<sup>2</sup>).** Gaps in the table represent unmodelled scenarios. 20% AEP coastal flooding results are assumed identical to 1% AEP coastal flooding but with delayed onset of +0.14 m RSLR.

| RSLR (m) | 1% AEP coastal flooding |                       |                     | Permanent inundation |                       |                     | Coastal erosion     |                   |
|----------|-------------------------|-----------------------|---------------------|----------------------|-----------------------|---------------------|---------------------|-------------------|
|          | Dynamic model           | Static-inclined model | Static-planar model | Dynamic model        | Static-inclined model | Static-planar model | $E_{\text{medium}}$ | $E_{\text{high}}$ |
| 0.1      | 25                      | 26                    | 19                  | 3                    | 3                     | 2                   | 3                   | 5                 |
| 0.2      | 27                      | 27                    | 22                  |                      | 3                     | 3                   |                     |                   |
| 0.3      | 29                      | 30                    |                     |                      | 4                     |                     |                     |                   |
| 0.4      | 32                      | 33                    | 29                  | 5                    | 6                     | 4                   |                     |                   |
| 0.5      | 34                      | 36                    |                     |                      | 8                     |                     | 5                   |                   |
| 0.6      | 36                      | 39                    | 35                  | 9                    | 10                    | 7                   |                     |                   |
| 0.7      | 39                      | 41                    |                     |                      | 12                    |                     | 6                   | 8                 |
| 0.8      | 42                      | 44                    | 40                  | 13                   | 15                    | 12                  |                     |                   |
| 0.9      | 45                      | 47                    |                     |                      | 17                    |                     | 7                   |                   |
| 1        | 47                      | 49                    |                     |                      | 20                    |                     |                     |                   |
| 1.25     | 52                      | 54                    | 51                  | 26                   | 28                    | 27                  | 8                   | 11                |

|     | 1% AEP coastal flooding |    |    | Permanent inundation |    |    | Coastal erosion |  |
|-----|-------------------------|----|----|----------------------|----|----|-----------------|--|
| 1.6 | 59                      | 61 | 57 | 37                   | 39 | 38 | 11              |  |

**Table S2. Total number of buildings exposed.** Gaps in the table represent unmodelled scenarios. 20% AEP coastal flooding results are assumed identical to 1% AEP coastal flooding but with delayed onset of +0.14 m RSLR.

|          | 1% AEP coastal flooding |                       |                     | Permanent inundation |                       |                     | Coastal erosion     |                   |
|----------|-------------------------|-----------------------|---------------------|----------------------|-----------------------|---------------------|---------------------|-------------------|
| RSLR (m) | Dynamic model           | Static-inclined model | Static-planar model | Dynamic model        | Static-inclined model | Static-planar model | $E_{\text{medium}}$ | $E_{\text{high}}$ |
| 0.1      | 227                     | 379                   | 100                 | 3                    | 3                     | 1                   | 76                  | 297               |
| 0.2      | 334                     | 510                   | 142                 |                      | 6                     | 3                   |                     |                   |
| 0.3      | 454                     | 664                   |                     |                      | 8                     |                     |                     |                   |
| 0.4      | 589                     | 844                   | 404                 | 9                    | 9                     | 6                   |                     |                   |
| 0.5      | 782                     | 1064                  |                     |                      | 14                    |                     | 222                 |                   |
| 0.6      | 1035                    | 1276                  | 710                 | 19                   | 23                    | 12                  |                     |                   |
| 0.7      | 1323                    | 1511                  |                     |                      | 52                    |                     | 256                 | 475               |
| 0.8      | 1560                    | 1720                  | 1108                | 88                   | 105                   | 38                  |                     |                   |
| 0.9      | 1831                    | 1964                  |                     |                      | 175                   |                     | 403                 |                   |
| 1        | 2097                    | 2160                  |                     |                      | 242                   |                     |                     |                   |
| 1.25     | 2619                    | 2683                  | 2135                | 430                  | 471                   | 331                 | 480                 | 739               |
| 1.6      | 3217                    | 3269                  | 2855                | 976                  | 1117                  | 913                 |                     | 817               |

**Table S3. Total building replacement value (millions NZD\$ (2016)).** Gaps in the table represent unmodelled scenarios. 20% AEP coastal flooding results are assumed identical to 1% AEP coastal flooding but with delayed onset of +0.14 m RSLR.

|          | 1% AEP coastal flooding |                       |                     | Permanent inundation |                       |                     | Coastal erosion     |                   |
|----------|-------------------------|-----------------------|---------------------|----------------------|-----------------------|---------------------|---------------------|-------------------|
| RSLR (m) | Dynamic model           | Static-inclined model | Static-planar model | Dynamic model        | Static-inclined model | Static-planar model | $E_{\text{medium}}$ | $E_{\text{high}}$ |
| 0.1      | 104                     | 163                   | 48                  | 3                    | 2                     | 0                   | 18                  | 93                |
| 0.2      | 138                     | 211                   | 62                  |                      | 3                     | 1                   |                     |                   |
| 0.3      | 174                     | 260                   |                     |                      | 6                     |                     |                     |                   |
| 0.4      | 229                     | 324                   | 181                 | 7                    | 6                     | 5                   |                     |                   |
| 0.5      | 333                     | 438                   |                     |                      | 8                     |                     | 65                  |                   |
| 0.6      | 416                     | 497                   | 340                 | 10                   | 10                    | 8                   |                     |                   |
| 0.7      | 541                     | 590                   |                     |                      | 20                    |                     | 79                  | 148               |
| 0.8      | 619                     | 649                   | 504                 | 39                   | 47                    | 18                  |                     |                   |
| 0.9      | 725                     | 766                   |                     |                      | 77                    |                     | 130                 |                   |
| 1        | 805                     | 843                   |                     |                      | 106                   |                     |                     |                   |
| 1.25     | 963                     | 1026                  | 884                 | 187                  | 221                   | 137                 | 155                 | 229               |
| 1.6      | 1273                    | 1233                  | 1132                | 442                  | 530                   | 422                 |                     | 248               |

**Table S4. Median depth of flooding of buildings (metres).** Gaps in the table represent unmodelled scenarios. 20% AEP coastal flooding results are assumed identical to 1% AEP coastal flooding but with delayed onset of +0.14 m RSLR.

| RSLR (m) | 1% AEP coastal flooding |                       |                     | Permanent inundation |                       |                     |
|----------|-------------------------|-----------------------|---------------------|----------------------|-----------------------|---------------------|
|          | Dynamic model           | Static-inclined model | Static-planar model | Dynamic model        | Static-inclined model | Static-planar model |
| 0.1      | 0.51                    | 0.52                  | 0.43                | 0.39                 | 0.36                  | 0.30                |
| 0.2      | 0.50                    | 0.54                  | 0.48                |                      | 0.34                  | 0.33                |
| 0.3      | 0.51                    | 0.54                  |                     |                      | 0.42                  |                     |
| 0.4      | 0.55                    | 0.56                  | 0.56                | 0.49                 | 0.50                  | 0.53                |
| 0.5      | 0.58                    | 0.58                  |                     |                      | 0.51                  |                     |
| 0.6      | 0.59                    | 0.61                  | 0.56                |                      | 0.40                  | 0.59                |
| 0.7      | 0.64                    | 0.65                  |                     | 0.45                 | 0.36                  |                     |
| 0.8      | 0.70                    | 0.69                  |                     |                      | 0.37                  | 0.40                |
| 0.9      | 0.74                    | 0.73                  | 0.62                | 0.40                 | 0.40                  |                     |
| 1        | 0.81                    | 0.79                  |                     |                      | 0.44                  |                     |
| 1.25     | 0.98                    | 0.93                  | 0.82                | 0.53                 | 0.53                  | 0.54                |
| 1.6      | 1.21                    | 1.15                  | 1.01                | 0.59                 | 0.56                  | 0.57                |

**Table S5.** Estimate of land area affected from coastal erosion by different timeframe, sea level rise and probability levels. Based on scaling the length of shoreline for which coastal erosion assessments were undertaken versus total length of shoreline (Tonkin & Taylor 2019)

| Scenario                           | Total area affected (km <sup>2</sup> ) | Scaled up land area affected (km <sup>2</sup> ) |
|------------------------------------|----------------------------------------|-------------------------------------------------|
| Current $E_{\text{medium}}$        | 1.1                                    | 3.3                                             |
| Current $E_{\text{high}}$          | 1.7                                    | 5.1                                             |
| 2080 0.4m SLR $E_{\text{medium}}$  | 1.8                                    | 5.3                                             |
| 2080 0.6m SLR $E_{\text{medium}}$  | 1.9                                    | 5.6                                             |
| 2080 0.6m SLR $E_{\text{high}}$    | 2.6                                    | 7.8                                             |
| 2130 0.8m SLR $E_{\text{medium}}$  | 2.4                                    | 7.2                                             |
| 2130 1.25m SLR $E_{\text{medium}}$ | 2.6                                    | 7.8                                             |
| 2130 1.25m SLR $E_{\text{high}}$   | 3.6                                    | 10.7                                            |
| 2130 1.6m SLR $E_{\text{high}}$    | 3.8                                    | 11.3                                            |
